# Supplementary material for: Cost-effectiveness of a cardiac output-guided haemodynamic therapy algorithm in high-risk patients undergoing major gastrointestinal surgery
Source: Springer Nature journal article supplement (doi:10.1186/s13741-015-0024-x), 2015-12-01

**Cost-effectiveness of a peri-operative cardiac output-guided haemodynamic  
therapy algorithm in high-risk patients undergoing major gastrointestinal  
surgery**

**Online Supplementary material**

**Z Sadique<sup>1\*</sup>, DA Harrison<sup>2</sup>, R Grieve<sup>1</sup>, KM Rowan<sup>2</sup>, and RM Pearse<sup>3</sup> for the OPTIMISE study  
group**

<sup>1</sup> Department of Health Services Research and Policy, London School of Hygiene and Tropical  
Medicine, London, United Kingdom

<sup>2</sup> Intensive Care National Audit & Research Centre, London, United Kingdom

<sup>3</sup> Queen Mary University of London, London, United Kingdom

Correspondence address:

Adult Critical Care Unit

Royal London Hospital

Whitechapel

London

E1 1BB

United Kingdom

Tel: +44 20 3594 0346

e-mail: r.pearse@qmul.ac.uk

**Supplementary Table 1. Unit cost for individual surgical procedures.**

|                                 | <b>Items</b>                               | <b>Unit costs (£)</b> | <b>Source</b>                   |
|---------------------------------|--------------------------------------------|-----------------------|---------------------------------|
| <b>Monitoring</b>               | Monitor                                    | 95                    | Indicative manufacturer's price |
| <b>Surgery</b>                  | Lower gastrointestinal (elective)          | 1,777                 | NHS Reference cost              |
|                                 | Upper gastrointestinal (elective)          | 2,854                 | NHS Reference cost              |
|                                 | Small bowel +/- pancreas (elective)        | 2,450                 | NHS Reference cost              |
|                                 | Urological or gynaecological (elective)    | 6,485                 | NHS Reference cost              |
|                                 | Aortic or Abdominal surgery (non-elective) | 6,423                 | NHS Reference cost              |
| <b>Blood &amp; fluid</b>        | Colloid (500 ml)                           | 4.70                  | British National Formulary      |
|                                 | Crystalloid (1000 ml)                      | 1.83                  | Personal communication          |
|                                 | Red cell (280 ml)                          | 122.09                | NHS Blood & Transplant          |
|                                 | Frozen fresh plasma (250 ml)               | 29.98                 | NHS Blood & Transplant          |
| <b>Drug &amp; other related</b> | Dopexamine (50 mg)                         | 25.20                 | British National Formulary      |
|                                 | Syringe                                    | 0.36                  | Personal communication          |
|                                 | Giving set                                 | 1.53                  | Personal communication          |
|                                 | Saline                                     | 2.30                  | Personal communication          |
| <b>Hospital costs</b>           | Critical care level 2                      | 868                   | NHS Reference cost              |
|                                 | Critical care level 3                      | 1,416                 | NHS Reference cost              |
|                                 | General surgical ward                      | 260                   | NHS Reference cost              |

**Supplementary Table 2. Hospital costs (£) up to six months in the trial intervention groups.**

Data presented as mean (SD).

|                               | <b>Peri-operative cardiac<br/>output-guided,<br/>haemodynamic therapy<br/>algorithm<br/>(n=368)</b> | <b>Usual care<br/><br/>(n=365)</b> |
|-------------------------------|-----------------------------------------------------------------------------------------------------|------------------------------------|
| Surgery costs                 | 2,453 (999)                                                                                         | 2,440 (1019)                       |
| Intervention                  |                                                                                                     |                                    |
| Cardiac monitor costs         | 94 (10)                                                                                             | 8 (27)                             |
| Drug (Dopexamine) costs       | 28 (6)                                                                                              | -                                  |
| Intravenous crystalloid costs | 5 (3)                                                                                               | 7 (3)                              |
| Intravenous colloid costs     | 21 (11)                                                                                             | 9 (8)                              |
| Blood products costs          | 82 (379)                                                                                            | 39 (205)                           |
| Critical care costs           | 3,202 (4,111)                                                                                       | 3,519 (5,598)                      |
| General surgical ward costs   | 2,687 (3,751)                                                                                       | 2,952 (3,267)                      |
| <b>Total costs</b>            | <b>8,574 (6,304)</b>                                                                                | <b>8,974 (7,217)</b>               |

**Supplementary Table 3. Subgroup analyses reporting incremental costs (£), quality adjusted life years (QALYs) and incremental net benefit at six months.**

Data presented as mean (95% confidence intervals). \*Incremental effects are adjusted for baseline variables including all variables used in minimisation algorithm.

|                                  | <b>Incremental costs*</b>    | <b>Incremental QALY*</b> | <b>Incremental net benefit*</b> |
|----------------------------------|------------------------------|--------------------------|---------------------------------|
| Overall                          | -404<br>(-1,313 to 505)      | 0.01<br>(0.00 to 0.02)   | 580<br>(-378 to 1,583)          |
| Urgency of surgery               |                              |                          |                                 |
| Elective (n=708)                 | -416<br>(-1,327 to 496)      | 0.01<br>(0.00 to 0.02)   | 579<br>(-383 to 1,541)          |
| Non-elective (n=25)              | -3,042<br>(-11,026 to 4,942) | -0.02<br>(-0.08 to 0.05) | 2,733<br>(-5,091 to 10,557)     |
| Type of surgery                  |                              |                          |                                 |
| Upper gastro (n=222)             | -273<br>(-2,361 to 1,815)    | 0.01<br>(-0.01 to 0.03)  | 454<br>(-1,699 to 2,607)        |
| Lower gastro (n=334)             | -796<br>(-1,903 to 311)      | 0.01<br>(-0.01 to 0.02)  | 906<br>(-272 to 2,083)          |
| Small bowel +/- pancreas (n=168) | 256<br>(-1,430 to 1,943)     | 0.01<br>(-0.01 to 0.04)  | 3<br>(-1,808 to 1,814)          |
| Timing of recruitment            |                              |                          |                                 |
| Early (n=160)                    | 879<br>(-1,257 to 3,015)     | -0.02<br>(-0.04 to 0.01) | -1,207<br>(-3,442 to 1,028)     |
| Late (n=565)                     | -821<br>(-1,840 to 197)      | 0.02<br>(0.00 to 0.03)   | 1,133<br>(61 to 2,205)          |

**Supplementary Table 4. Goodness of fit of statistical models based on alternative distributions of survival functions.**

| <b>Distribution</b> | <b>Akaike Information Criteria</b> |
|---------------------|------------------------------------|
| Gompertz            | 1476.3                             |
| Lognormal           | 1509.3                             |
| Log-logistic        | 1482.7                             |
| Weibull             | 1474.6                             |
| Exponential         | 1474.8                             |

**Supplementary Table 5. Ratios (with 95% confidence intervals) of the mortality rates from applying alternative parametric extrapolations for OPTIMISE patients compared with the age-gender matched general population.**

| <b>Year</b>   | <b>Gompertz</b>     | <b>Log-normal</b>   | <b>Log-Logistic</b> | <b>Weibull</b>      | <b>Exponential</b>  |
|---------------|---------------------|---------------------|---------------------|---------------------|---------------------|
| <b>Year 1</b> | 0.64<br>(0.55-0.72) | 0.70<br>(0.62-0.78) | 0.67<br>(0.59-0.75) | 0.65<br>(0.57-0.73) | 0.58<br>(0.51-0.65) |
| <b>Year 2</b> | 0.98<br>(0.88-1.08) | 0.96<br>(0.86-1.05) | 0.97<br>(0.88-1.07) | 0.97<br>(0.87-1.07) | 0.98<br>(0.87-1.08) |
| <b>Year 3</b> | 1.17<br>(1.04-1.30) | 1.08<br>(0.98-1.19) | 1.14<br>(1.03-1.25) | 1.17<br>(1.05-1.29) | 1.24<br>(1.12-1.35) |
| <b>Year 4</b> | 1.26<br>(1.08-1.44) | 1.15<br>(1.04-1.26) | 1.23<br>(1.11-1.35) | 1.29<br>(1.15-1.42) | 1.41<br>(1.29-1.53) |
| <b>Year 5</b> | 1.30<br>(1.08-1.52) | 1.18<br>(1.06-1.29) | 1.28<br>(1.15-1.40) | 1.36<br>(1.22-1.50) | 1.5<br>(1.39-1.63)  |

**Supplementary Table 6. Sensitivity analyses reporting lifetime incremental costs (£), quality adjusted life years (QALYs), and incremental net benefit.**

Data presented as mean (95% confidence intervals). \*Incremental effects are adjusted for baseline variables including all variables used in minimisation algorithm.

|                                                       | Incremental costs*                    | Incremental QALY*                     | Incremental net benefit*                  |
|-------------------------------------------------------|---------------------------------------|---------------------------------------|-------------------------------------------|
| <b>Base case</b>                                      | <b>-404</b><br><b>(-1,313 to 504)</b> | <b>0.19</b><br><b>(-0.17 to 0.54)</b> | <b>4,168</b><br><b>(-3,063 to 11,398)</b> |
| Total costs including costs incurred in recovery unit | -412<br>(-1,319 to 495)               | 0.19<br>(-0.17 to 0.54)               | 4,175<br>(-3,056 to 11,405)               |
| Additional staff time for the intervention            | -216<br>(-1,125 to 693)               | 0.19<br>(-0.17 to 0.54)               | 3,979<br>(-3,252 to 11,209)               |
| Alternative QoL assumption                            | -405<br>(-1,314 to 504)               | 0.19<br>(-0.16 to 0.55)               | 4,289<br>(-3,025 to 11,603)               |
| QALY calculation for decedents up to time of death    | -405<br>(-1,314 to 504)               | 0.18<br>(-0.17 to 0.54)               | 4,097<br>(-3,184 to 11,379)               |
| QoL weights from OPTIMISE                             | -405<br>(-1,314 to 504)               | 0.18<br>(-0.14 to 0.50)               | 4,053<br>(-2,470 to 10,576)               |
| Weibull survival                                      | -405<br>(-1,314 to 504)               | 0.19<br>(-0.17 to 0.54)               | 4,163<br>(-3,061 to 11,386)               |

**Supplementary Figure 1. Cost-effectiveness acceptability curve (all patient six months analysis) describing the probability that cardiac output-guided haemodynamic therapy is cost effective for a range of decision makers' willingness to pay thresholds per quality-adjusted life year (QALY) gained when compared to usual peri-operative care.**

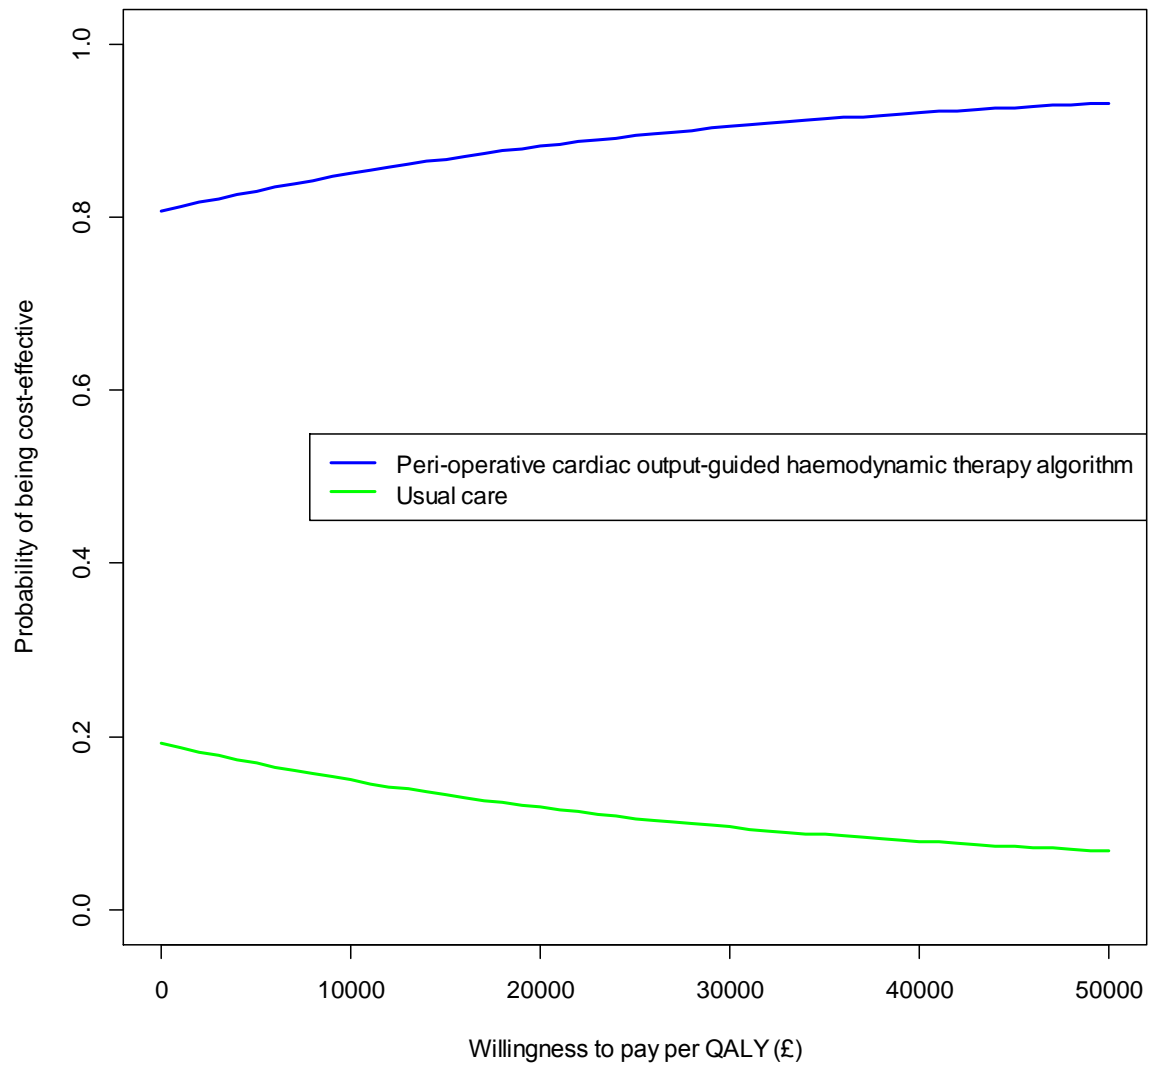



**Supplementary Figure 2. Kaplan-Meier survival curves of OPTIMISE patients stratified by treatment allocation group.**

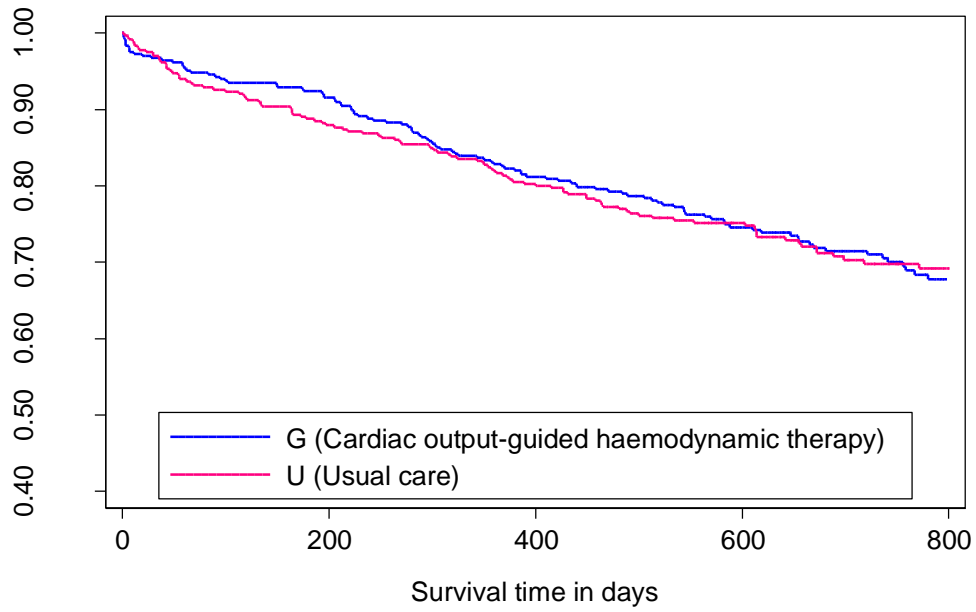

| Number at risk |     |     |     |     |     |
|----------------|-----|-----|-----|-----|-----|
| G              | 368 | 336 | 297 | 214 | 113 |
| U              | 365 | 321 | 293 | 208 | 112 |

**Supplementary Figure 3: Population expected value of perfect information (EVPI) illustrating the expected value of perfect information that would resolve uncertainty regarding the treatment decision for a range of decision makers' willingness to pay thresholds per quality-adjusted life year (QALY) gained.**

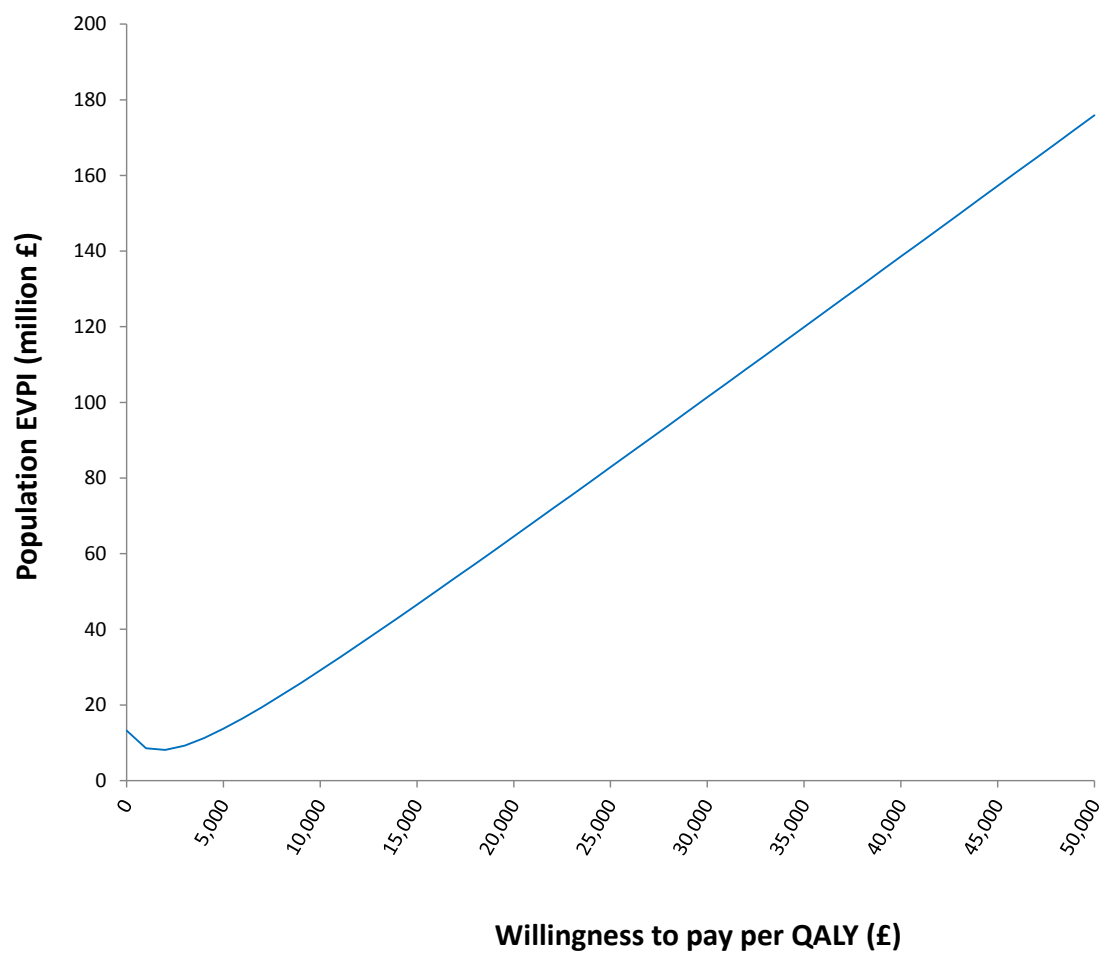

Supplement: MOESM1 [file 13741_2015_24_MOESM1_ESM.pdf]
